# Supplementary material
Source: PubMed Central journal article supplement (PMC2519723)

**S1**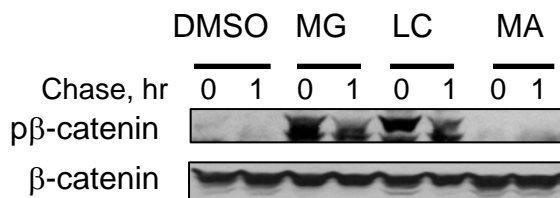**S2**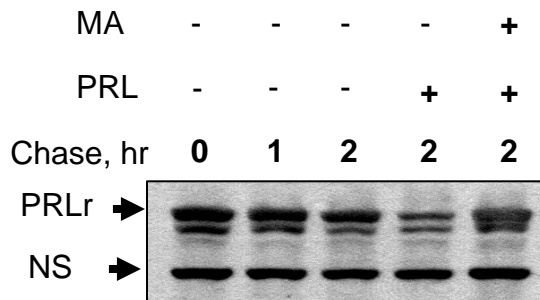**S3**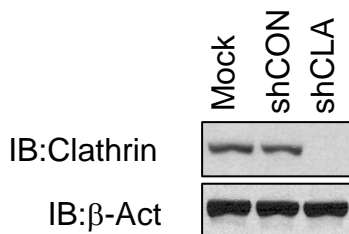**S4**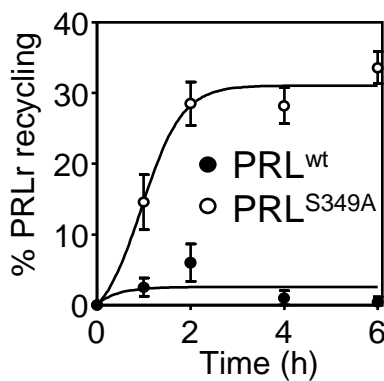**S5**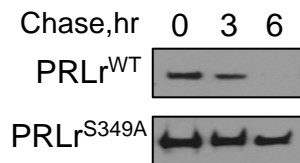**S6**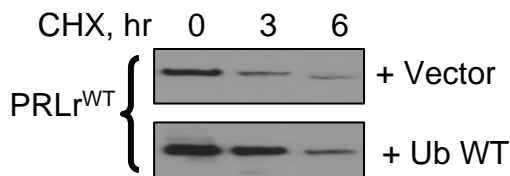**S7**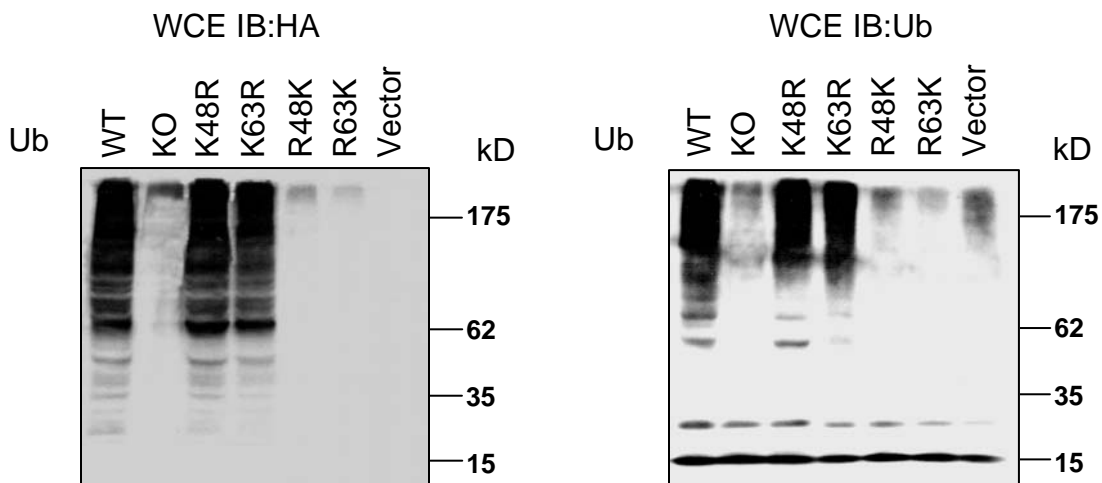

Supplement: supp_28_17_5275__1.pdf [file supp_28_17_5275__1.pdf]
